# Supplementary material for: Cryo-EM Structures of Two Bacteriophage Portal Proteins Provide Insights for Antimicrobial Phage Engineering
Source: MDPI journal article supplement (doi:10.3390/v13122532), 2021-12-16
Supplement: s1 [file s1]

Supplementary Table S1. Summary of structural evaluation of Portal complexes.

|                                              |                        |                        |
|----------------------------------------------|------------------------|------------------------|
|                                              |                        |                        |
|                                              | GA1                    | PhiCPV4                |
| <b>EMDB, PDB</b>                             | EMD-13664,<br>7PV2     | EMD-13665,<br>7PV4     |
| Microscope (Voltage)                         | Titan Krios<br>(300kV) | Titan Krios<br>(300kV) |
| Pixel size (Å/pix.)                          | 1.07                   | 1.07                   |
| Camera                                       | K2 (Counting)          | K2 (Counting)          |
| Defocus range (µm)                           | -1.2 – 2.0             | -1.2 – 2.0             |
| Electron Dose (e-/<br>Å <sup>2</sup> /frame) | 0.98                   | 0.985                  |
| Symmetry                                     | C12                    | C12                    |
| Number of micrographs                        | 2249                   | 2903                   |
| Initial number of<br>particles               | 50,466                 | 89,560                 |
| Final number of<br>particles                 | 22,456                 | 26,940                 |
| Map resolution range Å                       | 3.0 – 6.0              | 2.8 – 6.0              |
| Map Sharpening B<br>Factor                   | -97.7                  | -74.6                  |
| <b>Refinement</b>                            |                        |                        |
| Initial Model (PDB)                          | 1FOU                   | I-Tasser               |
| Model Resolution Å                           | 3.2                    | 2.8                    |
|                                              |                        |                        |
| <b>Model composition (Monomer)</b>           |                        |                        |
| Non-hydrogen atoms                           | 0                      | 0                      |
| Protein residues                             | 257                    | 256                    |
| Nucleotide                                   | 0                      | 0                      |
| <b>R.m.s Deviations</b>                      |                        |                        |
| Bond Lengths                                 | 0.011                  | 0.012                  |
| Bond angles                                  | 0.714                  | 2.05                   |
| <b>Validation</b>                            |                        |                        |
| Molprobability Score                         | 1.48                   | 0.79                   |
| Clashscore                                   | 4.28                   | 0.5                    |
| <b>Ramachandran (%)</b>                      |                        |                        |
| Favoured (%)                                 | 96.1                   | 98.4                   |
| Allowed (%)                                  | 3.95                   | 1.19                   |
| Outliers (%)                                 | 0                      | 0.4                    |
