# Supplementary material for: Cryo-EM Structures of Two Bacteriophage Portal Proteins Provide Insights for Antimicrobial Phage Engineering
Source: Viruses. 2021 Dec 16;13(12):2532. doi: 10.3390/v13122532 (PMC8703570; doi:10.3390/v13122532)
Supplement: Supplementary file 1 [file viruses-13-02532-s001.zip]

Archive with 4 entries (4 files):
- D_1292118172_val-report-full_P1_GA1.pdf
- D_1292118365_val-report-full_P1_phicpv4.pdf
- Portals_MS_Supp_fig_015dec21.pdf
- Supplementary_Table_1_EM-data_07dec21.pdf
